# Supplementary material for: La5Ti2Cu0.9Ag0.1S5O7 Modified with a Molecular Ni Catalyst for Photoelectrochemical H2 Generation
Source: PubMed Central journal article supplement (PMC6348378; doi:10.1002/chem.201801169), 2018-06-06
Supplement: CHEM-24-18393-s001.pdf [file CHEM-24-18393-s001.pdf]

# CHEMISTRY

## A **European** Journal

### Supporting Information

#### **La<sub>5</sub>Ti<sub>2</sub>Cu<sub>0.9</sub>Ag<sub>0.1</sub>S<sub>5</sub>O<sub>7</sub> Modified with a Molecular Ni Catalyst for Photoelectrochemical H<sub>2</sub> Generation**

Timothy E. Rosser,<sup>[a, b]</sup> Takashi Hisatomi,<sup>[a, e]</sup> Song Sun,<sup>[a, c]</sup> Daniel Ant3n-Garc3a,<sup>[b]</sup>  
Tutomu Minegishi,<sup>[a]</sup> Erwin Reisner,<sup>\*[b]</sup> and Kazunari Domen<sup>\*[a, d]</sup>

chem\_201801169\_sm\_miscellaneous\_information.pdf

## Materials and electrode preparation

Gallium-doped (1%)  $\text{La}_5\text{Ti}_2\text{Cu}_{0.9}\text{Ag}_{0.1}\text{S}_5\text{O}_7$  (LTCA)<sup>1,2</sup> and Ni(bis-diphosphine) molecular catalyst ( $[\text{Ni}(\text{P}_2^{\text{Ph}}\text{N}_2^{\text{PhCH}_2\text{PO}_3\text{H}_2})_2]\text{Br}_2 \cdot \text{HBr}$ ,  $\text{P}_2^{\text{Ph}}\text{N}_2^{\text{PhCH}_2\text{PO}_3\text{H}_2}$  = (1,5-phenyl-diphospha-3,7,4-(phosphonmethyl)phenyl-diazacyclooctane); **NiP**)<sup>3</sup> were prepared according to published procedures. All other materials were obtained from commercial sources and used without further purification.

Photocathodes were prepared by the particle transfer method.<sup>4</sup> Firstly, 50 mg LTCA was suspended in 1 mL 2-propanol by ultrasonication for 30 mins, and drop cast onto 4 slides each measuring 3 × 1 cm. After drying, Au was evaporated onto the LTCA by vacuum evaporation to a thickness of approximately 3 μm. The Au|LTCA composite was peeled away from the glass substrate, and excess particles removed by gentle ultrasonication between two glass plates.

The  $\text{TiO}_2$  layer was deposited by reactive RF (70 W) magnetron sputtering<sup>5</sup> with a high-purity Ti target and  $\text{O}_2$  and Ar partial pressures of 0.05 and 0.07 Pa, respectively, at room temperature, for 240 s unless otherwise stated. This method was previously reported as yielding a deposition rate of approximately 0.5 nm min<sup>-1</sup> using the same instrument under the same conditions.<sup>2</sup> The Au|LTCA| $\text{TiO}_2$  composites were subsequently annealed at 200 °C for 1 h in air. The Au|LTCA control electrodes were also annealed under the same conditions.

Modification with **NiP** was achieved by submersion of the free-standing Au|LTCA| $\text{TiO}_2$  composites in a 0.5 mM solution of **NiP** in methanol overnight, followed by brief submersion in neat MeOH to remove non-chemisorbed **NiP** and drying by evaporation in air. Subsequently, the **NiP**-modified electrodes were supported on glass plates with backing carbon tape and a wire attached to the Au backing layer with In solder. Finally, the non-LTCA areas of the electrode were covered with epoxy resin leaving no conducting areas exposed.

Quantification of **NiP** was achieved by submersion of the modified electrodes in 3 mL aqueous NaOH (0.1 M) for 5 min, followed by removal of the electrode and UV/vis spectroscopy of the resultant solution. Concentrations were obtained by interpolation of the absorbance at  $\lambda = 255$  nm on a calibration curve compiled from known concentrations of fresh **NiP** dissolved in 0.1 M NaOH.

Where required, modification with Pt was achieved by first mounting the Au|LTCA| $\text{TiO}_2$  composite onto glass with carbon tape, attaching a wire with In and sealing with epoxy resin as described above. The resultant electrode was subsequently placed in a pH 10 solution of  $\text{Na}_2\text{SO}_4$ ,  $\text{Na}_2\text{C}_2\text{O}_4$  (both 0.1 M), and  $\text{H}_2\text{PtCl}_6$  (3.5 μM) and held at a potential of 0.5 V vs RHE under simulated solar irradiation until the photocurrent stopped increasing (approximately 1 h). The electrode was finally rinsed with deionised water and dried under a stream of  $\text{N}_2$ .

UV/vis absorbance and diffuse reflectance spectra were obtained using a Jasco V-670 spectrophotometer.

XPS spectra were obtained on a JPS-90MX spectrometer using an Mg  $K\alpha$  source (8 kV, 10 mA) and a pass energy of 10 eV.

## Electrochemical methods

All electrochemical measurements were carried out on a Hokutodenko HSV-110 potentiostat with a working electrode as described above, a Ag/AgCl/KCl(sat) reference electrode (RE) and a Pt wire counter electrode (CE), under an Ar atmosphere and with stirring. All linear sweep voltammetry (LSV) and controlled potential photoelectrolysis (CPPE) experiments were performed at room temperature

and after purging the electrolyte solution with Ar for 20 min and the solutions were kept under a constant purge throughout the measurements. LSV scans were performed with a scan rate of  $10 \text{ mV s}^{-1}$  starting at the most negative potential (0 V vs RHE). Electrochemical measurements were typically performed in 0.1 M  $\text{Na}_2\text{SO}_4$ , adjusted to the required pH (as stated) by addition of  $\text{H}_2\text{SO}_4$  or NaOH solutions, unless otherwise stated.

Post-CPPE XPS spectra were obtained from electrodes previously subjected to 1 h CPPE in pH 3  $\text{Na}_2\text{SO}_4$  solution (0.1 M) at 0.3 V vs RHE, followed by rinsing with  $\text{H}_2\text{O}$  and drying under a stream for  $\text{N}_2$ .

Simulated solar irradiation was produced by a SAN-EI Electric Co. Ltd XES-40S2-CE solar simulator with an AM1.5G filter ( $\lambda > 300 \text{ nm}$ ) and measurements were performed at a position calibrated to 1 sun intensity.

IPCE measurements were performed at an applied potential of 0.3 V vs RHE in pH 3  $\text{Na}_2\text{SO}_4$  electrolyte solution. Single wavelength illumination obtained from an Asahi Spectra MAX-302 300 W Xe lamp equipped with narrow band-pass filters of the required wavelengths was applied for 30 s at each wavelength and the current density recorded, before ceasing the illumination for 10 s and applying the next wavelength. Light intensities were recorded with a calibrated Si photodiode (S2281-01, Hamamatsu Photonics).

$\text{H}_2$  evolution measurements were performed in a sealed electrochemical cell with 84 mL of 0.1 M  $\text{Na}_2\text{SO}_4$  (adjusted to pH 3) used as the electrolyte solution. The cell was purged with Ar for 1 h prior to measurement with the electrodes (modified LTCA working electrode, Pt wire CE and Ag/AgCl RE) submerged in the electrolyte solution, after which the cell was sealed and a potential of 0.3 V vs RHE and simulated solar irradiation were applied for 3 h. The headspace was sampled periodically and analysed using an Agilent 490 microGC. After 3 h, the potential was applied for a further hour without irradiation and the headspace was sampled for GC analysis until a plateau in  $\text{H}_2$  was reached. Calibration of  $\text{H}_2$  was achieved by electrolysis of the same electrolyte solution with a Pt anode and cathode.

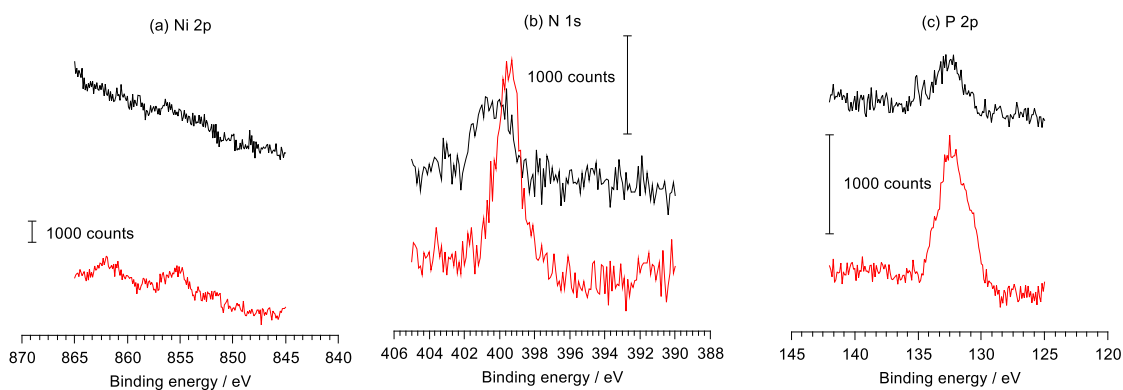

**Figure S1.** XPS spectra of LTCA|TiO<sub>2</sub>|NiP as prepared (red line) and after CPPE for 1 h (black line) in the (a) Ni 2p, (b) N 1s and (c) P 2p regions. The broadening of the N signal in the post CPPE spectrum in (b) could be explained by protonation of the amine ligand, the binding energy of which occurs at slightly higher values,<sup>6</sup> after exposure to the acidic conditions of the CPPE experiment.

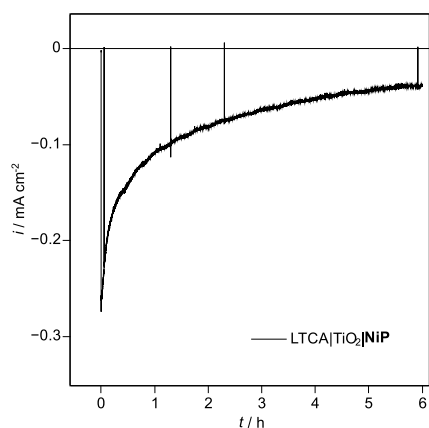

**Figure S2** Longer-term (6 h) CPPE for an LTCA|TiO<sub>2</sub>|NiP electrode at  $E_{\text{appl}} = 0.3$  V vs RHE performed in aqueous Na<sub>2</sub>SO<sub>4</sub> (0.1 M) electrolyte solution (pH 3) under simulated solar irradiation (AM1.5G) under a constant Ar purge at room temperature.

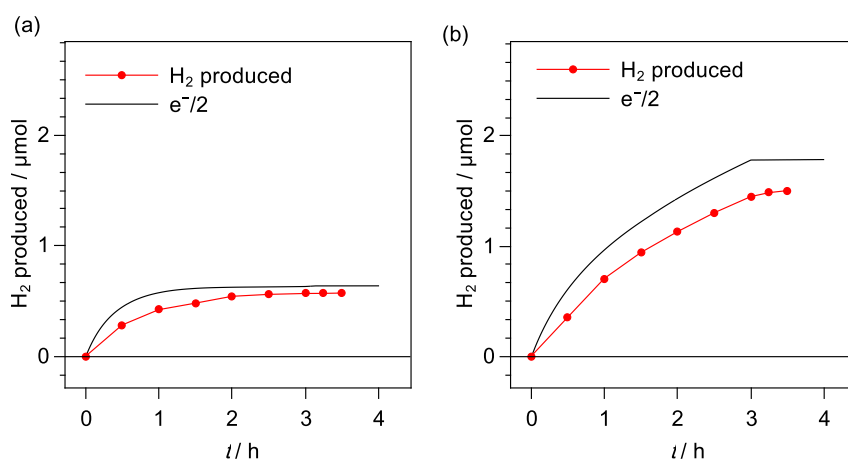

**Figure S3.** H<sub>2</sub> evolution on (a) LTCA|TiO<sub>2</sub> and (b) LTCA|TiO<sub>2</sub>|Pt electrodes in pH 3 Na<sub>2</sub>SO<sub>4</sub> (0.1 M) at  $E_{\text{appl}} = 0.3$  V vs RHE under simulated solar irradiation (AM1.5G) under an Ar atmosphere. (Values are normalised to an electrode area of 1 cm<sup>2</sup>). Experimental data are plotted in red and theoretical H<sub>2</sub> yields based on quantitative Faradaic yield in black.

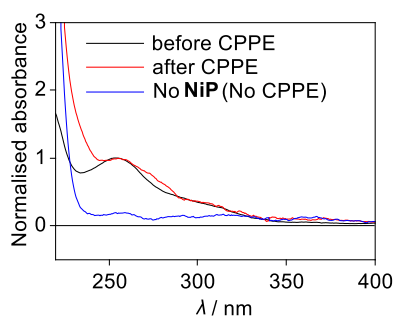

**Figure S4.** UV/vis spectra of NiP desorbed from the surface of LTCA|TiO<sub>2</sub>|NiP and LTCA|TiO<sub>2</sub> electrodes before and after CPPE at  $E_{\text{appl}} = 0.3$  V vs RHE in pH 3 solution under simulated solar irradiation (AM1.5G) for 3 h.

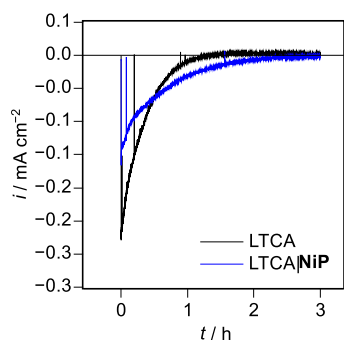

**Figure S5.** CPPE of LTCA photocathodes (no TiO<sub>2</sub>) modified with NiP with  $E_{\text{appl}} = 0.3$  V vs RHE performed in Na<sub>2</sub>SO<sub>4</sub> (0.1 M) electrolyte solution (pH 3) under simulated solar irradiation (AM1.5G) under a constant Ar purge.

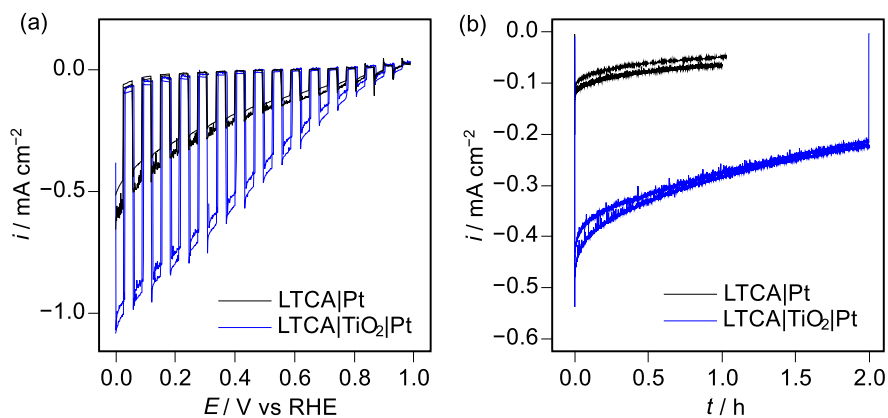

**Figure S6.** (a) Linear sweep voltammetry scans ( $\nu = 10$  mV s<sup>-1</sup>) and (b) CPPE at  $E_{\text{appl}} = 0.5$  V vs RHE of LTCA and LTCA|TiO<sub>2</sub> electrodes modified with Pt (by photoelectrochemical deposition) studied in pH 10 Na<sub>2</sub>SO<sub>4</sub> (0.1 M) solution under simulated solar irradiation under a constant purge of Ar.

## Supporting references

- 1 T. Hisatomi, S. Okamura, J. Liu, Y. Shinohara, K. Ueda, T. Higashi, M. Katayama, T. Minegishi and K. Domen, *Energy Environ. Sci.*, 2015, **8**, 3354–3362.
- 2 J. Liu, T. Hisatomi, M. Katayama, T. Minegishi and K. Domen, *ChemPhotoChem*, 2018, **2**, 234–239.
- 3 M. A. Gross, A. Reynal, J. R. Durrant and E. Reisner, *J. Am. Chem. Soc.*, 2014, **136**, 356–366.
- 4 J. Liu, T. Hisatomi, G. Ma, A. Iwanaga, T. Minegishi, Y. Moriya, M. Katayama, J. Kubota and K. Domen, *Energy Environ. Sci.*, 2014, **7**, 2239–2242.
- 5 J. Liu, T. Hisatomi, D. H. K. Murthy, M. Zhong, M. Nakabayashi, T. Higashi, Y. Suzuki, H. Matsuzaki, K. Seki, A. Furube, N. Shibata, M. Katayama, T. Minegishi and K. Domen, *J. Phys. Chem. Lett.*, 2017, **8**, 375–379.
- 6 NIST X-ray Photoelectron Spectroscopy Database, Version 4.1 (National Institute of Standards and Technology, Gaithersburg, 2012), <http://srdata.nist.gov/xps/>.

End of Supporting Information
